# Supplementary material for: A dual mode electronic synapse based on layered SnSe films fabricated by pulsed laser deposition
Source: Royal Society of Chemistry journal article supplement (doi:10.1039/c9na00447e), 2020-01-01
Supplement: c9na00447e1.pdf [file c9na00447e1.pdf]

## Supplementary material

### **Dual Modes Electronic Synapse Based on Layered SnSe Films Fabricated by Pulsed Laser Deposition**

Xinxin Chen<sup>a</sup>, Chun-Hung Suen<sup>a</sup>, Hei-Man Yau<sup>a</sup>, Feichi Zhou<sup>a</sup>, Yang Chai<sup>a</sup>, Xiaodan Tang<sup>b</sup>, Xiaoyuan Zhou<sup>b,\*</sup>, Nicolas Onofrio<sup>a,\*</sup> and Ji-Yan Dai<sup>a,\*</sup>

<sup>a</sup> *Department of Applied Physics, The Hong Kong Polytechnic University, Hung Hom, Kowloon, Hong Kong*

<sup>b</sup> *College of Physics, Chongqing University, Chongqing 401331, P. R. China.*

*\* Corresponding Author*

*E-mail addresses: [jiyan.dai@polyu.edu.hk](mailto:jiyan.dai@polyu.edu.hk) (J.-Y. Dai), [nicolas.onofrio@polyu.edu.hk](mailto:nicolas.onofrio@polyu.edu.hk) (N. Onofrio) and [xiaoyuan2013@cqu.edu.cn](mailto:xiaoyuan2013@cqu.edu.cn) (X. Zhou).*

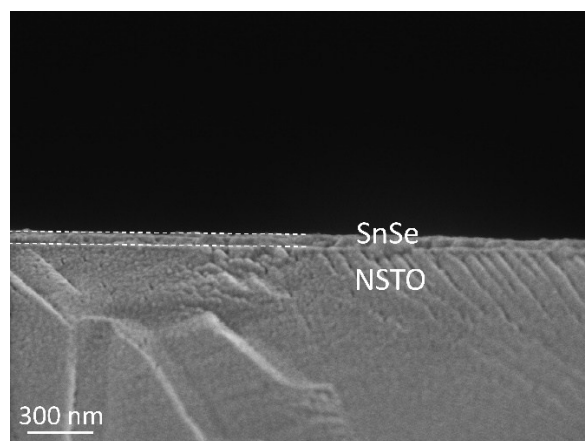

Fig. S1 SEM cross-section image of SnSe/NSTO structure

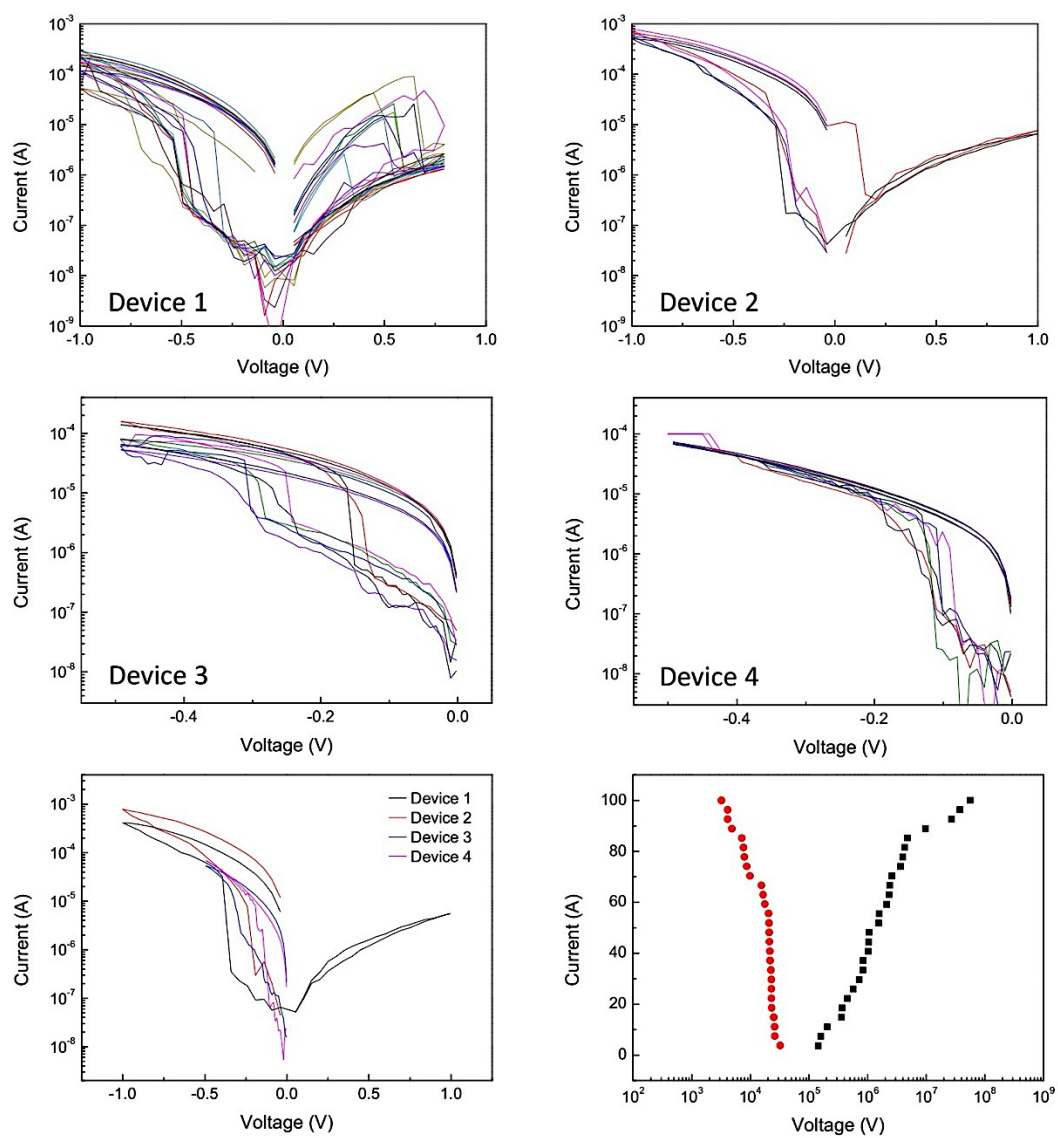

Fig. S2 Cycle-to-cycle and device-to-device variability of the SnSe-based memory device.

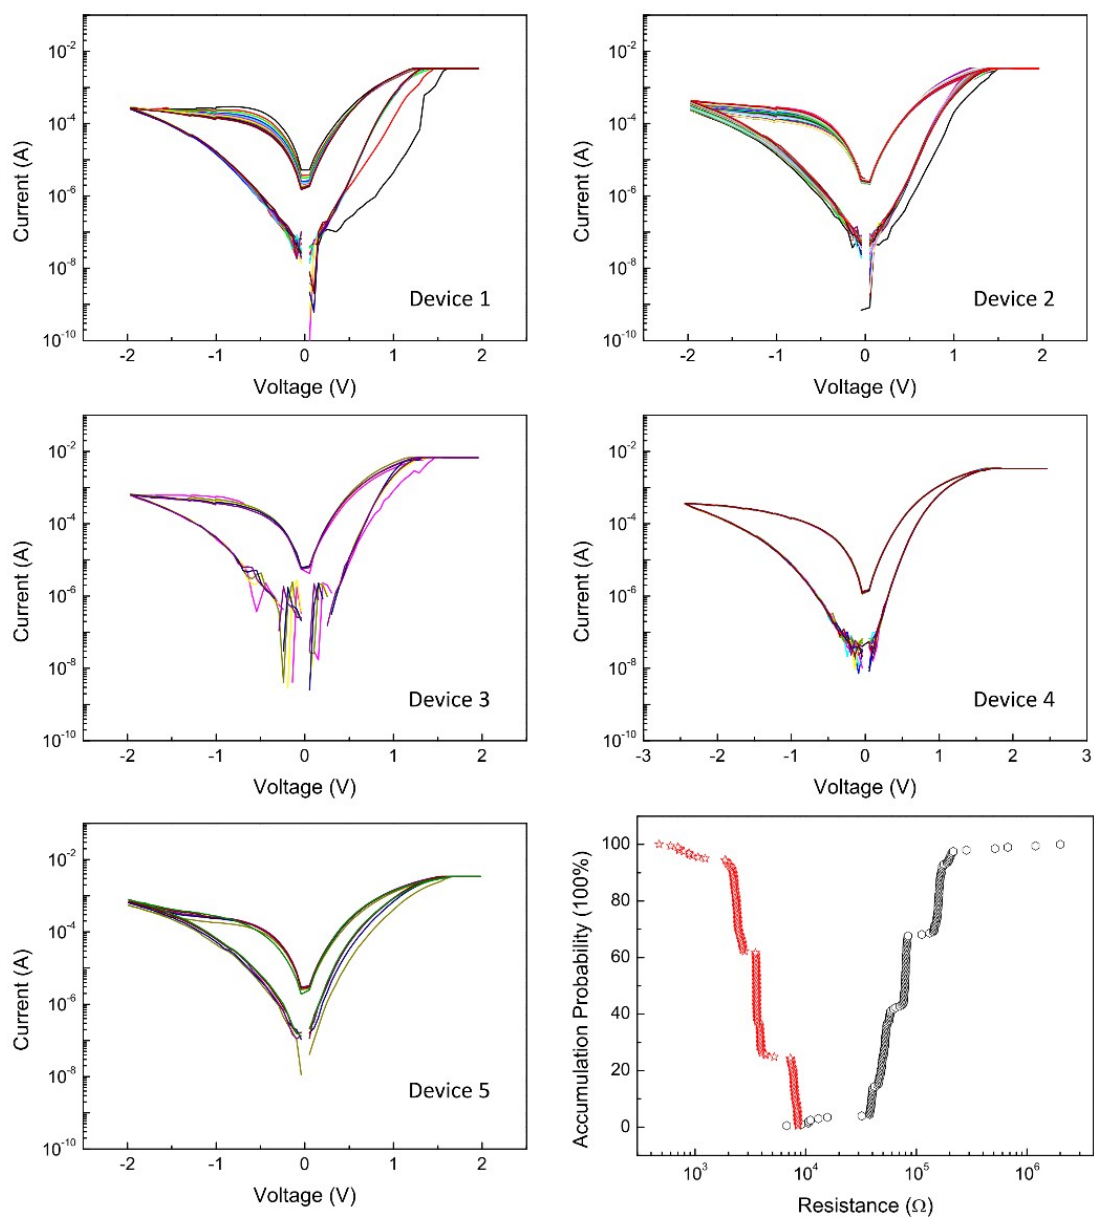

Fig. S3 Cycle-to-cycle and device-to-device variability of the SnSe-based memory device.

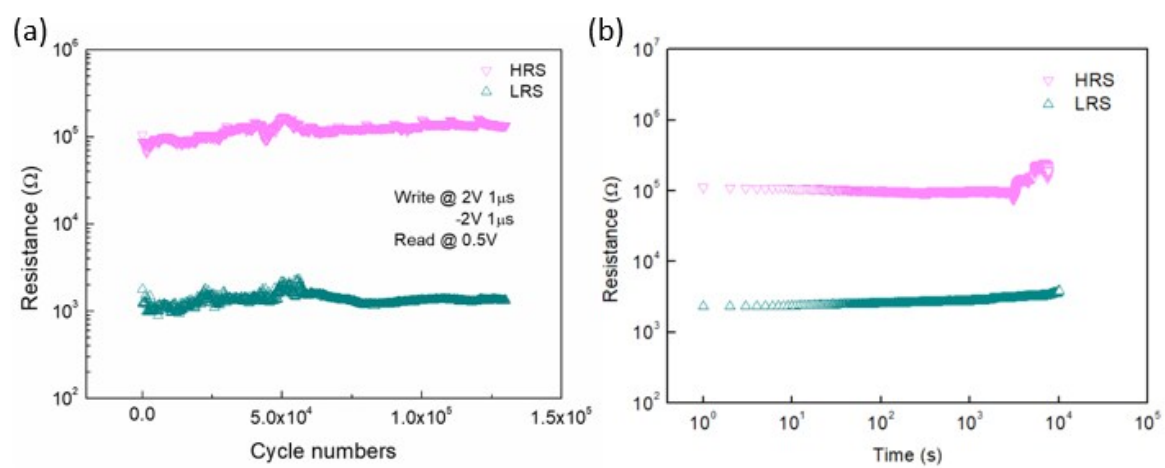

Fig. S4 Endurance and retention of the SnSe-based memory device.

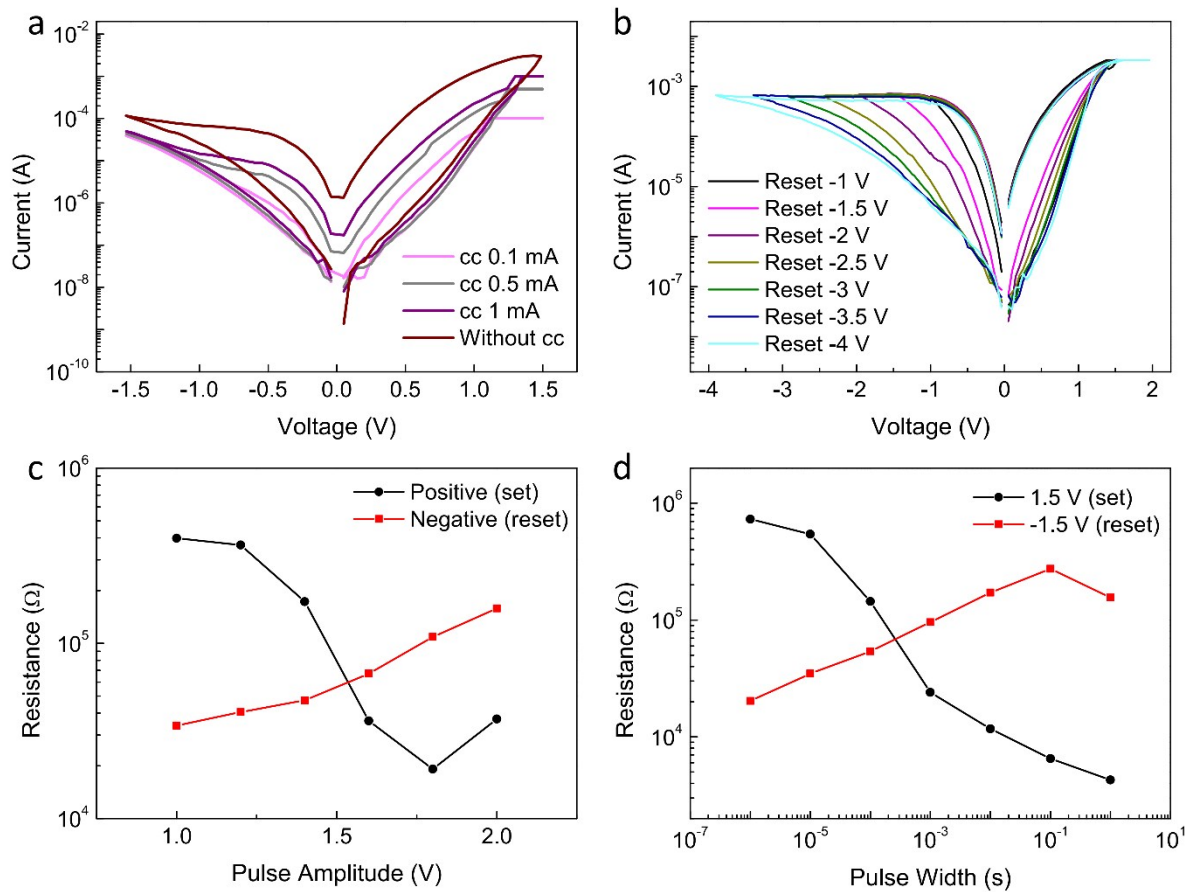

Fig. S5 (a) I-V curves with increasing compliance current. (b) I-V curves with increasing sweep voltage range. (c) Resistance dependence on pulse amplitude. (d) Resistance dependence on pulse width.

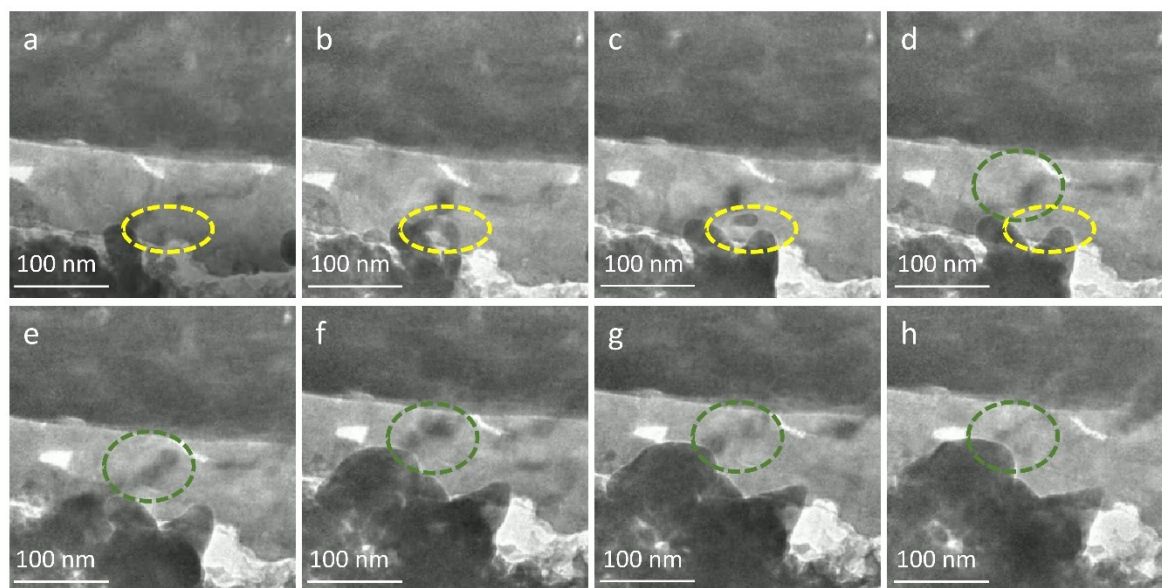

Fig. S6 TEM images displaying the formation and dissolution of Ag filament in SnSe film under electric field.

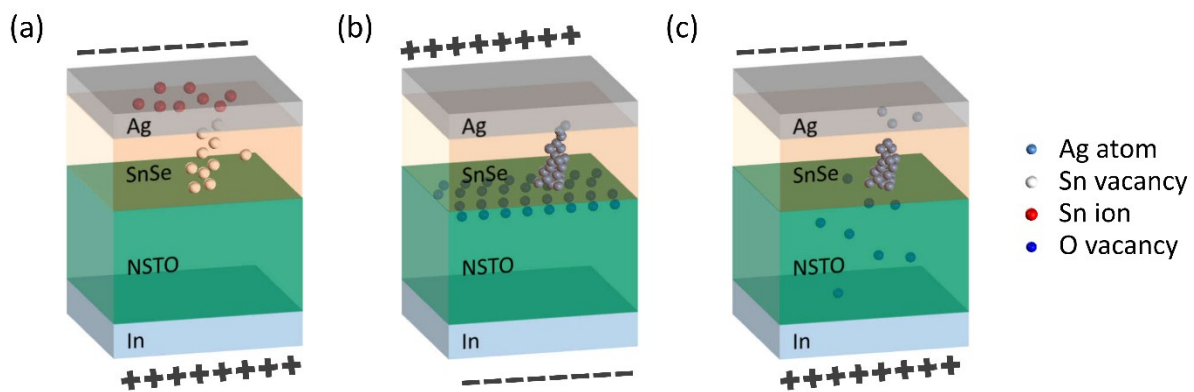

Fig. S7 (a) Mechanism for LRS of nonvolatile resistive switching. (b) Mechanism for HRS of nonvolatile resistive switching. (c) Mechanism for volatile LRS.
